# Supplementary material
Source: PubMed Central journal article supplement (PMC3999330)
Supplement: NIHMS526662-supplement-01.pdf [file NIHMS526662-supplement-01.pdf]

# The Development of the Neural Substrates of Cognitive Control in Adolescents with Autism Spectrum Disorders

## Supplemental Information

**Table S1.** Between Group Comparisons

| Region                                        | Cluster Size | Cluster <i>p</i> -value<br>FWE corrected | Voxel <i>p</i> -value<br>Uncorrected | Z-score | Talairach coordinates |     |     |
|-----------------------------------------------|--------------|------------------------------------------|--------------------------------------|---------|-----------------------|-----|-----|
|                                               |              |                                          |                                      |         | x                     | y   | z   |
| <b>Control</b>                                |              |                                          |                                      |         |                       |     |     |
| LH Middle Occipital Gyrus (BA18) <sup>a</sup> | 1144         | 0.00                                     | 0.00                                 | 5.09    | -32                   | -88 | -2  |
| LH Precuneus (BA7) <sup>a</sup>               | 4868         | 0.00                                     | 0.00                                 | 5.06    | -10                   | -60 | 44  |
| RH Middle Occipital Gyrus (BA18) <sup>a</sup> | 514          | 0.00                                     | 0.00                                 | 4.43    | 26                    | -93 | 10  |
| RH Middle Temporal Gyrus (BA20) <sup>a</sup>  | 785          | 0.00                                     | 0.00                                 | 4.37    | 53                    | -33 | -7  |
| LH Precentral Gyrus (BA6) <sup>a</sup>        | 323          | 0.01                                     | 0.00                                 | 3.96    | -42                   | -3  | 57  |
| RH Cingulate Gyrus (BA32)                     | 2838         | 0.00                                     | 0.00                                 | 4.19    | 12                    | 23  | 38  |
| LH Middle Frontal Gyrus (BA9)                 | 1147         | 0.02                                     | 0.00                                 | 4.06    | -36                   | 31  | 33  |
| LH Posterior Cingulate (BA23)                 | 846          | 0.06                                     | 0.00                                 | 3.96    | -4                    | -26 | 23  |
| RH Superior Frontal Gyrus (BA10)              | 1520         | 0.00                                     | 0.00                                 | 3.85    | 28                    | 54  | -3  |
| LH Superior Temporal Gyrus (BA38)             | 218          | 0.94                                     | 0.00                                 | 3.35    | -48                   | 13  | -11 |
| LH Calustrum                                  | 181          | 0.98                                     | 0.00                                 | 3.18    | -24                   | 29  | -1  |
| LH Middle Frontal Gyrus (BA10)                | 184          | 0.97                                     | 0.00                                 | 3.16    | -30                   | 52  | -6  |
| <b>Autism</b>                                 |              |                                          |                                      |         |                       |     |     |
| RH Parahippocampal Gyrus (BA34)               | 47           | 1.00                                     | 0.00                                 | 3.31    | 14                    | -3  | -13 |
| RH Middle Temporal Gyrus (BA21)               | 159          | 0.99                                     | 0.00                                 | 3.22    | 55                    | -1  | -13 |
| Brainstem, medulla                            | 71           | 1.00                                     | 0.00                                 | 3.10    | 2                     | -37 | -40 |
| RH Middle Temporal Gyrus (BA21)               | 38           | 1.00                                     | 0.00                                 | 2.91    | 57                    | -37 | -2  |
| Brainstem, pons                               | 11           | 1.00                                     | 0.00                                 | 2.83    | -6                    | -15 | -19 |
| RH Hippocampus                                | 23           | 1.00                                     | 0.00                                 | 2.81    | 28                    | -18 | -9  |
| RH Superior Frontal Gyrus (BA9)               | 19           | 1.00                                     | 0.00                                 | 2.76    | 22                    | 56  | 29  |
| RH Thalamus, Pulvinar                         | 15           | 1.00                                     | 0.00                                 | 2.71    | 8                     | -29 | 7   |
| LH Precentral Gyrus (BA6)                     | 10           | 1.00                                     | 0.00                                 | 2.71    | -22                   | -14 | 71  |
| RH Culmen                                     | 24           | 1.00                                     | 0.00                                 | 2.66    | 10                    | -26 | -17 |

BA, Brodmann area; LH, left hemisphere; RH, right hemisphere.

Regions of activation for red trials minus green trials during the cue phase in controls ( $n = 27$ ) and patients ( $n = 27$ ) for  $T > 2.4$  ( $p = .01$ ). Statistical values are cluster corrected at a family-wise error (FWE) rate of  $p < .05$ . Regions were defined using Talairach Daemon and the "Nearest Gray Matter" option (1-3).

<sup>a</sup> These clusters are part of a very large (22117 voxels) cluster at a threshold of  $p < .01$ . These are the subclusters that make up that cluster, using a more stringent  $p < .001$  threshold to better localize the activation.

<sup>b</sup> Approximate Talairach coordinates were derived by using a MATLAB function written by Matthew Brett (<http://www.imaging.mrc-cbu.cam.ac.uk/downloads/MNI2tal/mni2tal.m>) to convert from Montreal Neurological Institute space.

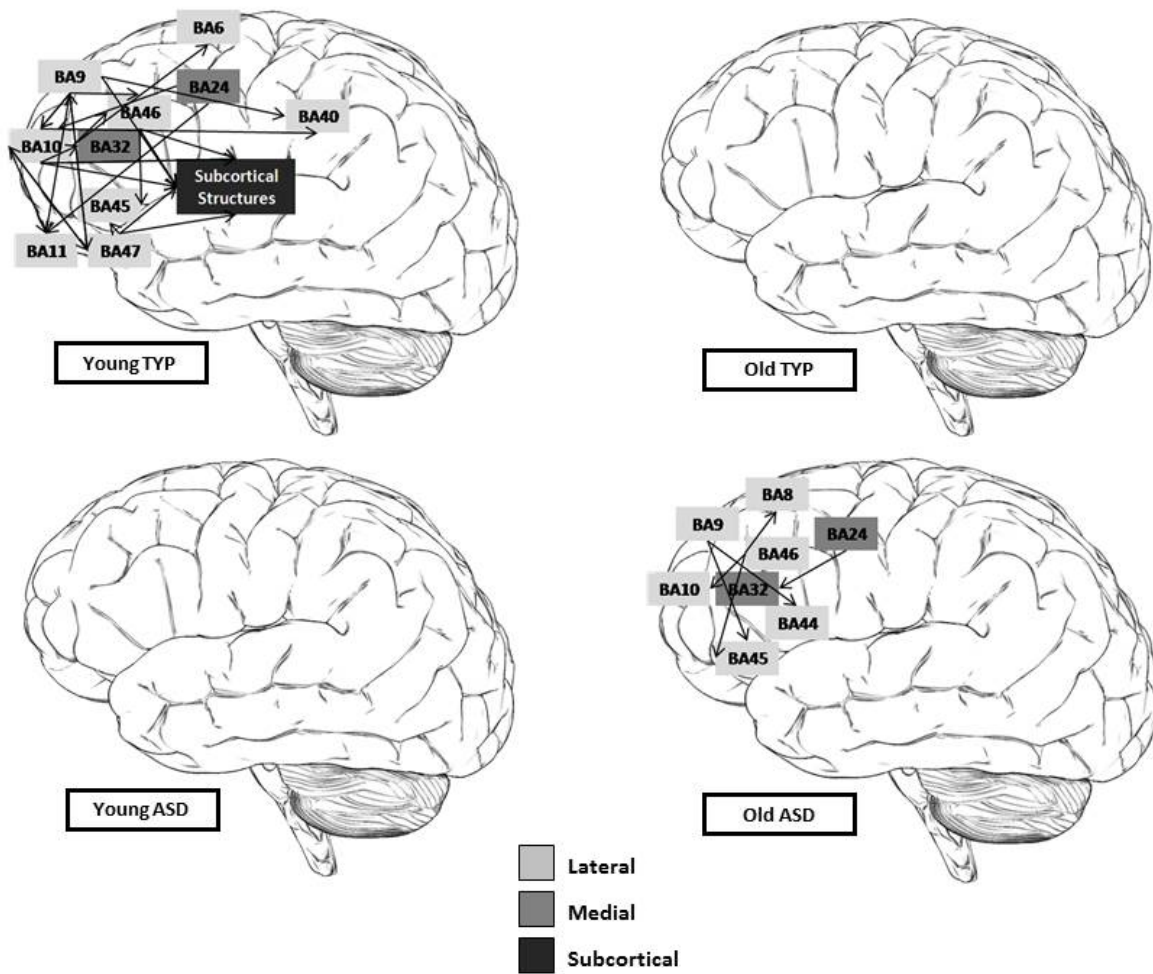

**Figure S1.** Significant within group functional connectivity in younger and older adolescents with autism spectrum disorder (ASD) and typical development (TYP). BA, Brodmann area.

## Supplemental References

1. Lancaster JL, Rainey LH, Summerlin JL, Freitas CS, Fox PT, Evans AC, *et al.* (1997): The Talairach Daemon, a database server for Talairach Atlas Labels. *Neuroimage*. 5:S633.
2. Lancaster JL, Woldorff MG, Parsons LM, Liotti M, Freitas CS, Rainey L, *et al.* (2000): Automated Talairach atlas labels for functional brain mapping. *Hum Brain Mapp*. 10:120-131.
3. Maldjian JA, Laurienti PJ, Kraft RA, Burdette JH (2003): An automated method for neuroanatomic and cytoarchitectonic atlas-based interrogation of fMRI data sets. *Neuroimage*. 19:1233-1239.
